# Supplementary material for: Immune responses against group B Streptococcus monovalent and pentavalent capsular polysaccharide tetanus toxoid conjugate vaccines in Balb/c mice
Source: PubMed Central journal article supplement — iScience. 2023 Jul 13;26(8):107380. doi: 10.1016/j.isci.2023.107380 (PMC10415928; doi:10.1016/j.isci.2023.107380), 2023-07-13
Supplement: mmc1.pdf [file mmc1.pdf]

## **Supplemental information**

### **Immune responses against group B *Streptococcus* monovalent and pentavalent capsular polysaccharide tetanus toxoid conjugate vaccines in Balb/c mice**

**Nisha Dhar, Ebrahim Mohamed, Frank Kirstein, Matthew Williams, Shantal Dorasamy, Petrus van Zyl, Madelyn Johnstone Robertson, Taigh Anderson, Lois M. Harden, Kimberly Jardine, Balaji Veeraraghavan, Seanette Wilson, Patrick Tippoo, Shabir A. Madhi, and Gaurav Kwatra**

# SUPPLEMENTARY INFORMATION

## Supplementary Figures

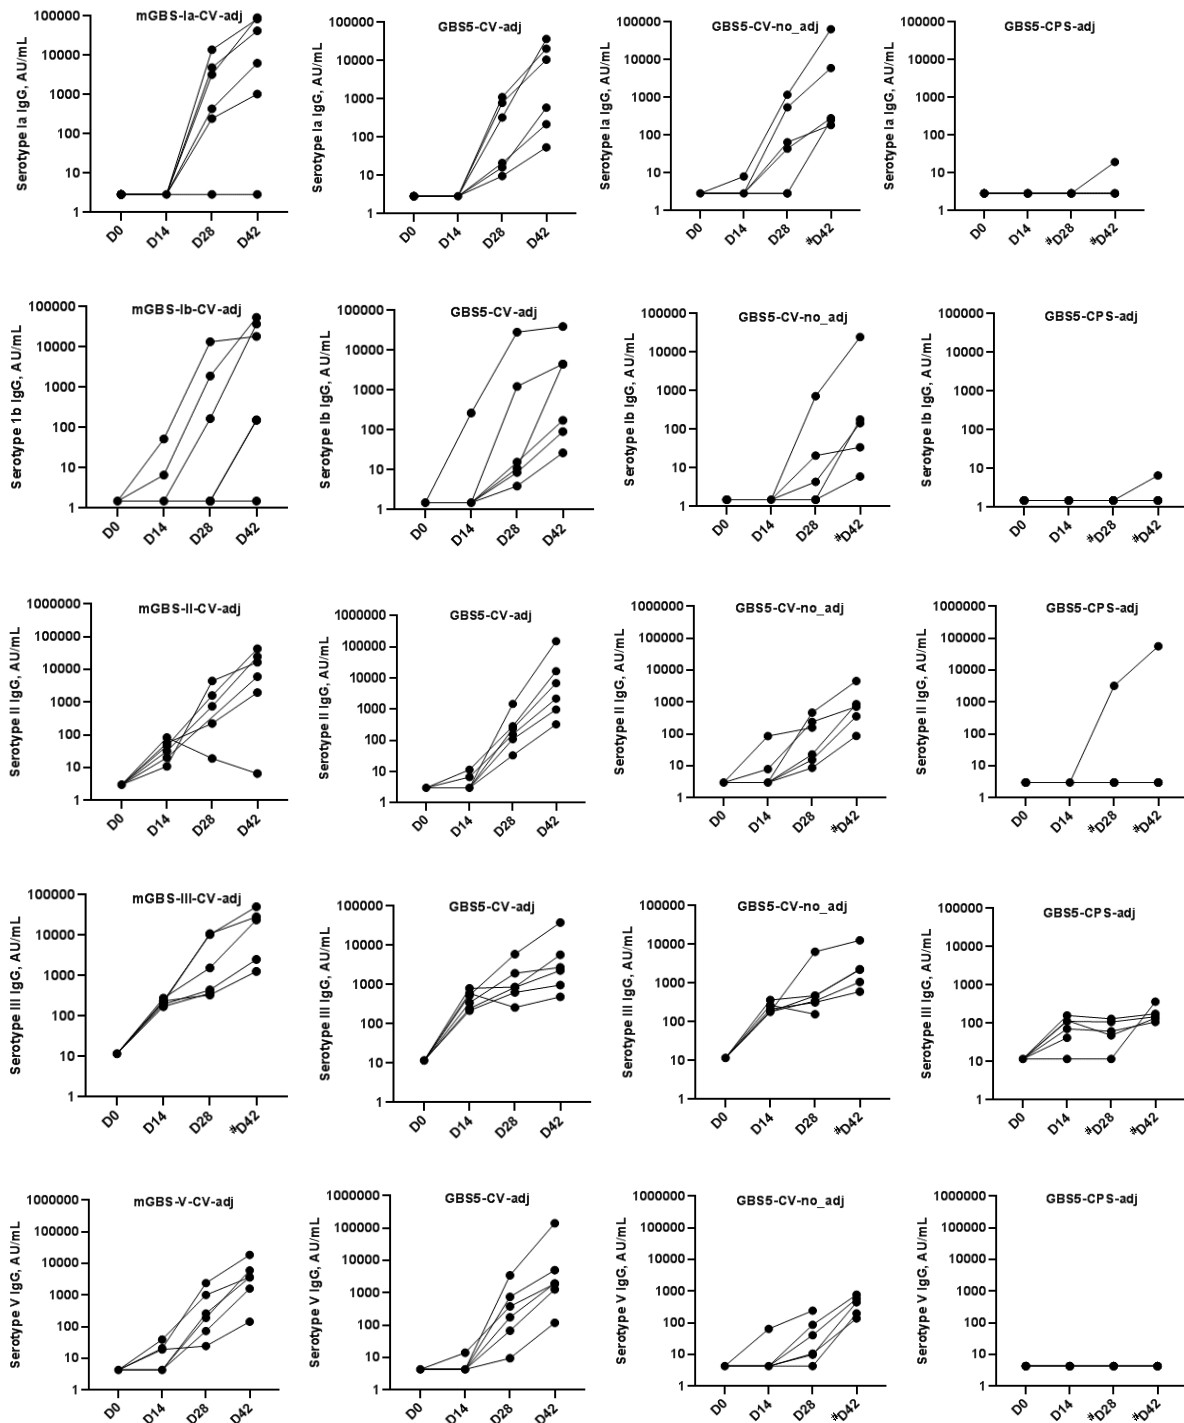

**Figure S1: Serotype specific IgG responses among vaccination groups, related to Figure 2.** Represented are pre-immunization day 0 (D0) and post-immunization day 14 (D14), day 28 (D28), and day 42 (D42) on X axis, and serotype specific IgG concentrations (black dots) in arbitrary units (AU/ml) on Y axis among monovalent conjugate vaccines with adjuvant (mGBS-Ia-CV-adj, mGBS-Ib-CV-adj, mGBS-II-CV-adj, mGBS-III-CV-adj, mGBS-V-CV-adj), pentavalent conjugate vaccine with adjuvant (GBS5-CV-adj) and without adjuvant (GBS5-CV-no\_adj), and unconjugated pentavalent CPS vaccine with adjuvant (GBS5-CPS-adj) study groups. # indicates observation based on 5 mice.

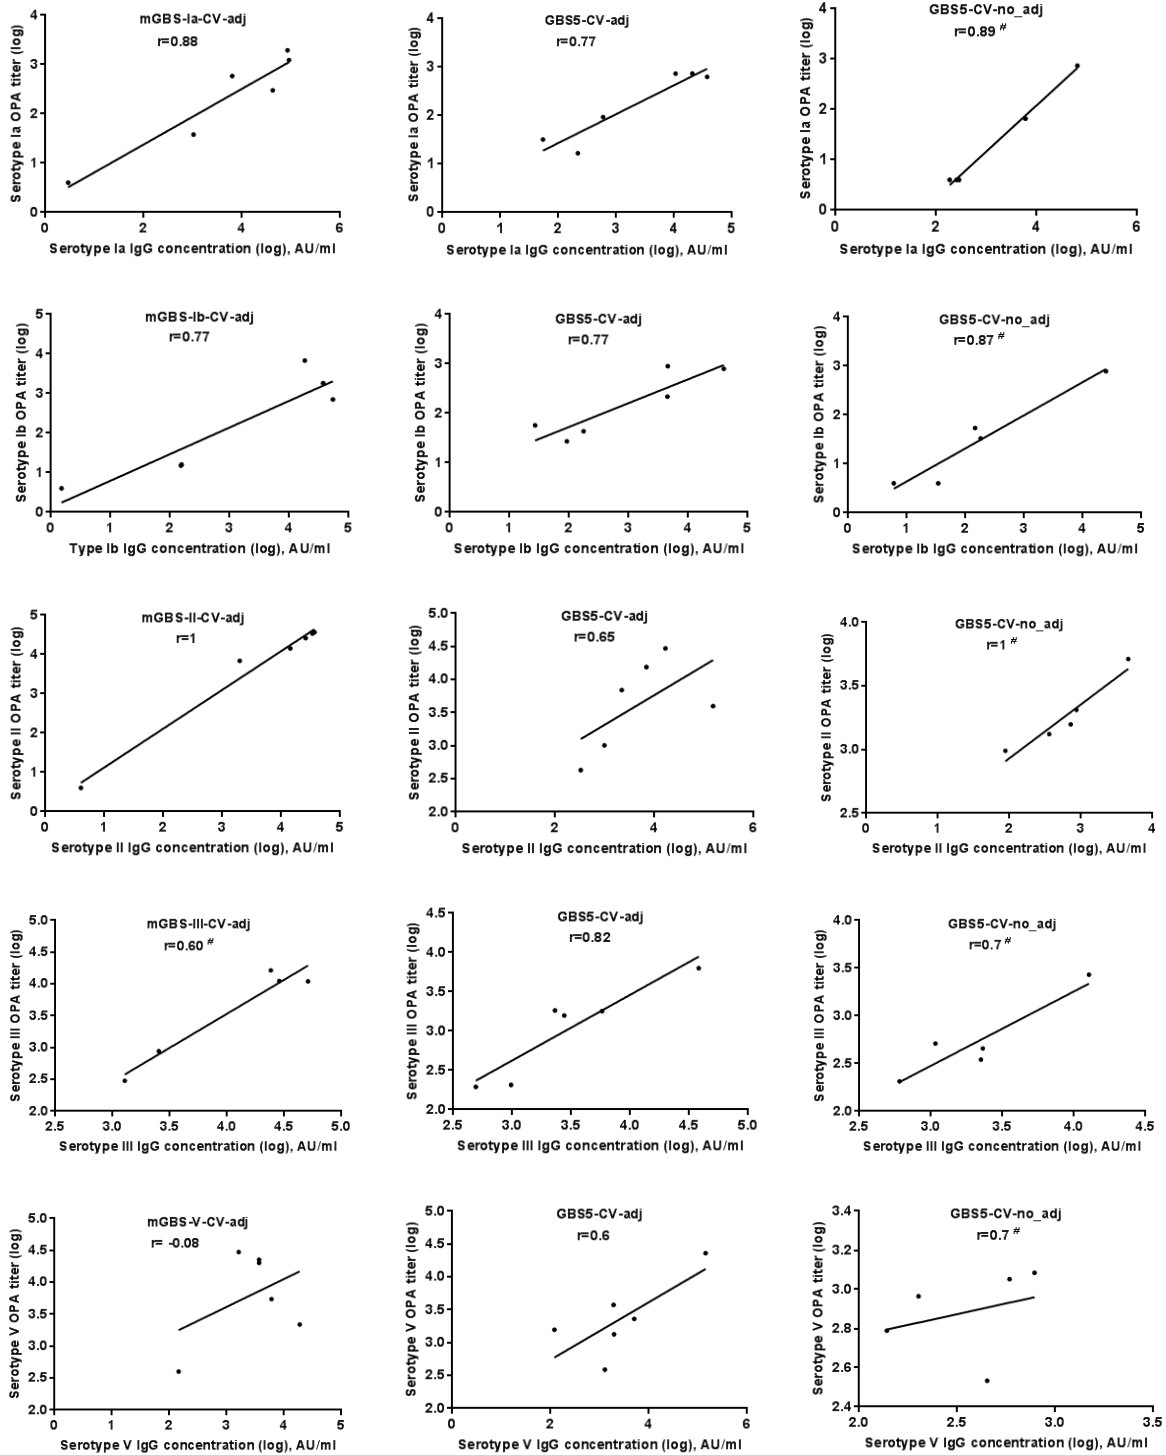

**Figure S2: Correlation between serotype-specific IgG concentrations and opsonophagocytic titers among conjugate vaccine groups, related to Figure 4.** Represented are serotype specific IgG concentrations in arbitrary units (AU/ml) on X axis, opsonophagocytic (OPA) titers on Y axis among monovalent conjugate vaccines with adjuvant (mGBS-Ia-CV-adj, mGBS-Ib-CV-adj, mGBS-II-CV-adj, mGBS-III-CV-adj, mGBS-V-CV-adj), pentavalent conjugate vaccine with adjuvant (GBS5-CV-adj) and without adjuvant (GBS5-CV-no\_adj) study groups, Spearman correlation coefficient (r), # indicates analysis based on 5 mice.

## Supplementary tables

**Table S1: Summary of the analytical data generated for the capsular polysaccharide used for the generation of the conjugates, related to STAR methods.**

| <b>Serotype</b> | <b>Residual protein</b> | <b>Residual nuclei acid</b> | <b>Molecular weight (kDa)</b> |
|-----------------|-------------------------|-----------------------------|-------------------------------|
| <b>Ia</b>       | < 3 %                   | < 3 %                       | 138                           |
| <b>Ib</b>       | < 3 %                   | < 3 %                       | 124                           |
| <b>II</b>       | < 3 %                   | < 3 %                       | 109                           |
| <b>III</b>      | < 3 %                   | < 3 %                       | 128                           |
| <b>V</b>        | < 3 %                   | < 3 %                       | 169                           |

**Table S2: Summary of the analytical data generated for the monovalent conjugates used in the vaccine formulations, related to STAR methods.**

| <b>Serotype</b> | <b>CPS concentration (mg/mL)</b> | <b>TT concentration (mg/mL)</b> | <b>Free sugar (%)</b> | <b>CPS:TT ratio</b> | <b>MW (kDa)</b> | <b>Endotoxin</b> |
|-----------------|----------------------------------|---------------------------------|-----------------------|---------------------|-----------------|------------------|
| <b>Ia</b>       | 0.70                             | 0.71                            | 4.94                  | 0.94                | 276 & 595       | < 0.1 EU/μg      |
| <b>Ib</b>       | 0.82                             | 0.86                            | 7.92                  | 0.88                | 266 & 575       | < 0.1 EU/μg      |
| <b>II</b>       | 0.40                             | 0.60                            | 5.57                  | 0.63                | 213             | < 0.1 EU/μg      |
| <b>III</b>      | 0.34                             | 0.49                            | 17.01                 | 0.58                | 242             | < 0.1 EU/μg      |
| <b>V</b>        | 0.85                             | 0.77                            | 5.41                  | 1.04                | 288 & 494       | < 0.1 EU/μg      |

**Table S3: Serotype Ia specific IgG concentrations pre-immunisation (day 0), and at three post-immunization intervals (day 14, 28, and 42), and opsonophagocytic (OPA) titers post-third immunization dose (day 42) among study groups, related to Figure 2 and 3.**

| Study group                                                                    | Day 0<br>Serotype Ia-IgG,<br>AU/ml | Day 14<br>Serotype Ia-IgG, AU/ml | Day 28<br>Serotype Ia-IgG, AU/ml | Day 42<br>Serotype Ia-IgG,<br>AU/ml | Day 42<br>Serotype Ia-OPA<br>titers |
|--------------------------------------------------------------------------------|------------------------------------|----------------------------------|----------------------------------|-------------------------------------|-------------------------------------|
|                                                                                | GMC (95% CI)                       | GMC (95% CI),<br>fold change*    | GMC (95% CI),<br>fold change*    | GMC (95% CI),<br>fold change*       | GMT (95% CI)                        |
| Placebo                                                                        | 2.90 §                             | 2.90 §<br>0                      | 2.90 §<br>0                      | 2.90 §<br>0                         | 4 §                                 |
| Monovalent serotype Ia CPS-TT conjugate vaccine with adjuvant (mGBS-Ia-CV-adj) | 2.90 §                             | 2.90 §<br>0                      | 639.1 (26.12-15639.0)<br>220.37  | 4294 (66.36-277812)<br>1480.68      | 199 (17-2369)                       |
| Pentavalent CPS-TT conjugate vaccine with adjuvant (GBS5-CV-adj)               | 2.90 §                             | 2.90 §<br>0                      | 99.34 (10.63-928.6)<br>34.25     | 1963 (116.6- 33067)<br>676.89       | 160 (27-957)                        |
| Pentavalent CPS-TT conjugate vaccine without adjuvant (GBS5-CV-no_adj)         | 2.90 §                             | 3.43 (2.22-5.31)<br>1.18         | 50.09 (3.50-714.9)<br>17.27      | 1395 (57.61-33780.0)<br>481.03 #    | 20 (1-370) #                        |
| Unconjugated pentavalent CPS vaccine with adjuvant (GBS5-CPS-adj)              | 2.90 §                             | 2.90 §<br>0                      | 2.90 §<br>0 #                    | 4.24 (1.47-12.2)<br>1.46 #          | 4 §#                                |

\*calculated from day 0

# indicates analysis based on 5 mice

§ 95% CI not applicable- all sample IgG titers were below limit of detection

geometric mean concentrations (GMCs)

**Table S4: Serotype 1b specific IgG concentrations pre-immunisation (day 0), and at three post-immunization intervals (day 14, 28, and 42), and opsonophagocytic (OPA) titers post-third immunization dose (day 42) among study groups, Figure 2 and 3.**

| Study group                                                                    | Day 0<br>Serotype 1b-IgG,<br>AU/ml | Day 14<br>Serotype 1b-IgG,<br>AU/ml | Day 28<br>Serotype 1b-IgG,<br>AU/ml | Day 42<br>Serotype 1b-IgG,<br>AU/ml | Day 42<br>Serotype 1b-OPA titers |
|--------------------------------------------------------------------------------|------------------------------------|-------------------------------------|-------------------------------------|-------------------------------------|----------------------------------|
|                                                                                | GMC (95% CI)                       | GMC (95% CI),<br>fold change*       | GMC (95% CI),<br>fold change*       | GMC (95% CI),<br>fold change*       | GMT (95% CI)                     |
| Placebo                                                                        | 1.50 §                             | 1.50 §<br>0                         | 1.50 §<br>0                         | 1.50 §<br>0                         | 4 §                              |
| Monovalent serotype 1b CPS-TT conjugate vaccine with adjuvant (mGBS-1b-CV-adj) | 1.50 §                             | 3.47 (0.75-16.05)<br>2.31           | 121.7 (2.42-6099)<br>81.13          | 1048 (13.23-82947)<br>698.66        | 142 (6-3504)                     |
| Pentavalent CPS-TT conjugate vaccine with adjuvant (GBS5-CV-adj)               | 1.50 §                             | 3.56 (0.38-32.85)<br>2.37           | 76.72 (1.86-3153)<br>51.14          | 839.0 (43.51-16180)<br>559.33       | 147 (30-724)                     |
| Pentavalent CPS-TT conjugate vaccine without adjuvant (GBS5-CV-no_adj)         | 1.50 §                             | 1.50 §<br>0                         | 7.78 (0.59-101.9)<br>5.18           | 167.8 (3.53-7959)<br>111.86 #       | 29 (2-444) #                     |
| Unconjugated pentavalent CPS vaccine with adjuvant (GBS5-CPS-adj)              | 1.50 §                             | 1.50 §<br>0                         | 1.50 §<br>0 #                       | 2.02 (0.88-4.63)<br>1.34 #          | 4 §#                             |

\*calculated from day 0

# indicates analysis based on 5 mice

§ 95% CI not applicable- all sample IgG titers were below limit of detection  
geometric mean concentrations (GMCs)

**Table S5: Serotype II specific IgG concentrations pre-immunisation (day 0), and at three post-immunization intervals (day 14, 28, and 42), and opsonophagocytic (OPA) titers post-third immunization dose (day 42) among study groups, Figure 2 and 3.**

| Study group                                                                              | Day 0<br>Serotype II-IgG,<br>AU/ml | Day 14<br>Serotype II-IgG,<br>AU/ml | Day 28<br>Serotype II-IgG, AU/ml | Day 42<br>Serotype II-IgG, AU/ml | Day 42<br>Serotype II-OPA titers |
|------------------------------------------------------------------------------------------|------------------------------------|-------------------------------------|----------------------------------|----------------------------------|----------------------------------|
|                                                                                          | GMC (95% CI)                       | GMC (95% CI),<br>fold change*       | GMC (95% CI),<br>fold change*    | GMC (95% CI),<br>fold change*    | GMT (95% CI)                     |
| Placebo                                                                                  | 3.05 §                             | 3.05 §<br>0                         | 3.05 §<br>0                      | 3.05 §<br>0                      | 4 §                              |
| Monovalent serotype II<br>CPS-TT conjugate vaccine<br>with adjuvant (mGBS-II-CV-<br>adj) | 3.05 §                             | 34.15 (15.79-73.84)<br>11.19        | 472.4 (35.0-6377)<br>154.88      | 3360 (112.3-100578)<br>1101.63   | 4825 (119-196516)                |
| Pentavalent CPS-TT<br>conjugate vaccine with<br>adjuvant (GBS5-CV-adj)                   | 3.05 §                             | 4.350 (2.38-7.96)<br>1.42           | 197.7 (53.37-732.6)<br>64.81     | 4808 (484.1-47742)<br>1576.39    | 4199 (773-22823)                 |
| Pentavalent CPS-TT<br>conjugate vaccine without<br>adjuvant (GBS5-CV-<br>no_adj)         | 3.05 §                             | 6.25 (1.52-25.66)<br>2.04           | 62.10 (11.0-356.6)<br>20.36      | 617.4 (103.9-3669)<br>202.42 #   | 1848 (842-4054) #                |
| Unconjugated pentavalent<br>CPS vaccine with adjuvant<br>(GBS5-CPS-adj)                  | 3.05 §                             | 3.05 §<br>0                         | 12.31 (0.255-592.0)<br>4.03 #    | 21.77 (0.09-5099.0)<br>7.13 #    | 17 (1-261) #                     |

\*calculated from day 0

# indicates analysis based on 5 mice

§ 95% CI not applicable- all sample IgG titers were below limit of detection

geometric mean concentrations (GMCs)

**Table S6: Serotype III specific IgG concentrations pre-immunisation (day 0), and at three post-immunization intervals (day 14, 28, and 42), and opsonophagocytic (OPA) titers post-third immunization dose (day 42) among study groups, Figure 2 and 3.**

| Study group                                                                             | Day 0<br>Serotype III-IgG,<br>AU/ml | Day 14<br>Serotype III-IgG, AU/ml | Day 28<br>Serotype III-IgG,<br>AU/ml | Day 42<br>Serotype III-IgG,<br>AU/ml | Day 42<br>Serotype III-OPA titers |
|-----------------------------------------------------------------------------------------|-------------------------------------|-----------------------------------|--------------------------------------|--------------------------------------|-----------------------------------|
|                                                                                         | GMC (95% CI)                        | GMC (95% CI),<br>fold change*     | GMC (95% CI),<br>fold change*        | GMC (95% CI),<br>fold change*        | GMT (95% CI)                      |
| Placebo                                                                                 | 11.75 §                             | 11.75 §<br>0                      | 11.75 §<br>0                         | 11.75 §<br>0                         | 4 §                               |
| Monovalent serotype III CPS-<br>TT conjugate vaccine with<br>adjuvant (mGBS-III-CV-adj) | 11.75 §                             | 220.1 (185.0-261.8)<br>18.73      | 1458 (260.6-8160)<br>124.08          | 10266 (1354-77855)<br>873.70 #       | 3507 (375-32791) #                |
| Pentavalent CPS-TT<br>conjugate vaccine with<br>adjuvant (GBS5-CV-adj)                  | 11.75 §                             | 411.0 (238.3-709.0)<br>34.97      | 1063 (347.8-3248)<br>90.46           | 2958 (602.2-14533)<br>251.74         | 1045 (246-4428)                   |
| Pentavalent CPS-TT<br>conjugate vaccine without<br>adjuvant (GBS5-CV-no_adj)            | 11.75 §                             | 225.1 (167.1-303.4)<br>19.15      | 541.4 (141.3-2075)<br>46.07          | 2117 (510-8792)<br>180.17 #          | 537 (161-1787) #                  |
| Unconjugated pentavalent<br>CPS vaccine with adjuvant<br>(GBS5-CPS-adj)                 | 11.75 §                             | 65.10 (23.75-178.4)<br>5.54       | 55.07 (16.85-180)<br>4.68 #          | 170.1 (95.48-302.9)<br>14.47 #       | 48 (29-79) #                      |

\*calculated from day 0

# indicates analysis based on 5 mice

§ 95% CI not applicable- all sample IgG titers were below limit of detection

geometric mean concentrations (GMCs)



**Table S7: Serotype V specific IgG concentrations pre-immunisation (day 0), and at three post-immunization intervals (day 14, 28, and 42), and opsonophagocytic (OPA) titers post-third immunization dose (day 42) among study groups, Figure 2 and 3.**

| Study group                                                                            | Day 0<br>Serotype V-IgG,<br>AU/ml | Day 14<br>Serotype V-IgG, AU/ml | Day 28<br>Serotype V-IgG, AU/ml | Day 42<br>Serotype V-IgG, AU/ml | Day 42<br>Serotype V-OPA titers |
|----------------------------------------------------------------------------------------|-----------------------------------|---------------------------------|---------------------------------|---------------------------------|---------------------------------|
|                                                                                        | GMC (95% CI)                      | GMC (95% CI),<br>fold change*   | GMC (95% CI),<br>fold change*   | GMC (95% CI),<br>fold change*   | GMT (95% CI)                    |
| Placebo                                                                                | 4.35 §                            | 4.35 §<br>0                     | 4.35 §<br>0                     | 4.35 §<br>0                     | 4 §                             |
| Monovalent serotype V<br>CPS-TT conjugate vaccine<br>with adjuvant (mGBS-V-CV-<br>adj) | 4.35 §                            | 10.48 (3.68-29.78)<br>2.40      | 246.6 (42.52-1430)<br>56.68     | 2668 (478.4-14882)<br>613.33    | 6330 (1081-37072)               |
| Pentavalent CPS-TT<br>conjugate vaccine with<br>adjuvant (GBS5-CV-adj)                 | 4.35 §                            | 5.29 (3.19-8.78)<br>1.21        | 220.3 (26.10-1859)<br>50.64     | 2728 (242.5-30688)<br>627.12    | 2335 (565.4-9644)               |
| Pentavalent CPS-TT<br>conjugate vaccine without<br>adjuvant (GBS5-CV-<br>no_adj)       | 4.35 §                            | 6.82 (2.14-21.68)<br>1.56       | 27.25 (5.51-134.6)<br>6.26      | 356.2 (143.5-884.4)<br>81.88 #  | 766 (400-1470) #                |
| Unconjugated pentavalent<br>CPS vaccine with adjuvant<br>(GBS5-CPS-adj)                | 4.35 §                            | 4.35 §<br>0                     | 4.35 §<br>0 #                   | 4.35 §<br>0 #                   | 4.24 (1-12) #                   |

\*calculated from day 0

# indicates analysis based on 5 mice

§ 95% CI not applicable- all sample IgG titers were below limit of detection

geometric mean concentrations (GMCs)
